# Supplementary material for: Incipient Melanoma Brain Metastases Instigate Astrogliosis and Neuroinflammation
Source: Oxford University Press journal article supplement (doi:10.1158/0008-5472.can-16-0485), 2016-06-03
Supplement: 00085472can160485-sup-162449_1_supp_3449041_95l3nd.docx [file 00085472can160485-sup-162449_1_supp_3449041_95l3nd.docx]

|  |  | **N** | **Micrometastases** | **%** |
| --- | --- | --- | --- | --- |
| **Cohort I** | **Brains** | **6** | **3** | **50** |
| **Lungs** | **6** | **4** | **67** |
| **livers** | **6** | **4** | **67** |
| **Cohort II** | **Brains** | **10** | **4** | **40** |
| **Lungs** | **10** | **6** | **60** |
| **livers** | **9** | **3** | **33** |

**Supplementary Table 2**

***Incidence of spontaneous micrometastases***

Micrometastases in lungs and livers at 1.5 months after tumor cell injection (cohort I)or 3 months after injection (cohort II). Data were obtained by qPCR analysis ofmCherry in indicated tissues. Metastases were not evident when examinedmacroscopically.

56
